# Supplementary material for: Fatty Acid Binding Protein‐4 and Risk of Cardiovascular Disease: The Cardiovascular Health Study
Source: PubMed Central journal article supplement — J Am Heart Assoc. 2020 Apr 6;9(7):e014070. doi: 10.1161/JAHA.119.014070 (PMC7428637; doi:10.1161/jaha.119.014070), 2020-04-06
Supplement: JAH3-9-e014070-s001.pdf [file JAH3-9-e014070-s001.pdf]

# **Supplemental Material**

**Table S1. CVD Mortality among participants free of CVD According to Sex-Specific Quartiles.**

| FABP-4 Range | Person-Time | Deaths | Rate | 95% CI    |
|--------------|-------------|--------|------|-----------|
| Men          |             |        |      |           |
| ≤18.64       | 5329.6      | 117    | 21.9 | 18.3-26.3 |
| 18.65-23.63  | 4894.6      | 129    | 26.4 | 22.2-31.3 |
| 23.64-30.58  | 4554.7      | 131    | 28.8 | 24.2-34.1 |
| >30.58       | 3421.2      | 115    | 33.6 | 28.0-40.3 |
| Women        |             |        |      |           |
| ≤27.56       | 8531.6      | 162    | 19.0 | 16.3-22.1 |
| 27.57-35.25  | 8917.3      | 173    | 19.4 | 16.7-22.5 |
| 35.26-45.91  | 8665.7      | 197    | 22.7 | 19.8-26.1 |
| >45.91       | 7531.4      | 189    | 25.1 | 21.8-28.9 |

FABP-4: Fatty acid binding protein

**Table S2. Hazard ratios (95% confidence intervals) of cardiovascular mortality associated with circulating levels of FABP-4 among participants free of CVD in sex-specific quartiles.**

|                                             | Q1     | Q2                  | Q3                  | Q4                  | per doubling        |
|---------------------------------------------|--------|---------------------|---------------------|---------------------|---------------------|
| <b>Cardiovascular Mortality<sup>+</sup></b> |        |                     |                     |                     |                     |
| <b>WOMEN</b>                                |        |                     |                     |                     |                     |
|                                             | ≤27.56 | >27.56-35.25        | >35.25-45.91        | >45.91              |                     |
| Model 1 <sup>#</sup>                        | (Ref.) | 0.99<br>(0.79-1.23) | 1.16<br>(0.93-1.44) | 1.25<br>(0.99-1.58) | 1.23<br>(1.07-1.42) |
| Model 2 <sup>*</sup>                        | (Ref.) | 0.94<br>(0.75-1.17) | 1.16<br>(0.93-1.44) | 1.09<br>(0.86-1.38) | 1.14<br>(0.99-1.32) |
| Model 3 <sup>+</sup>                        | (Ref.) | 0.95<br>(0.76-1.18) | 1.16<br>(0.93-1.44) | 1.10<br>(0.87-1.39) | 1.14<br>(0.99-1.32) |
| <b>MEN</b>                                  |        |                     |                     |                     |                     |
|                                             | ≤18.65 | >18.64-23.63        | >23.63-30.58        | >30.58              |                     |
| Model 1 <sup>#</sup>                        | (Ref.) | 1.20<br>(0.92-1.55) | 1.33<br>(1.02-1.73) | 1.64<br>(1.23-2.21) | 1.54<br>(1.27-1.87) |
| Model 2 <sup>*</sup>                        | (Ref.) | 1.13<br>(0.87-1.46) | 1.22<br>(0.93-1.60) | 1.49<br>(1.10-2.00) | 1.41<br>(1.16-1.71) |
| Model 3 <sup>+</sup>                        | (Ref.) | 1.08<br>(0.83-1.40) | 1.17<br>(0.89-1.53) | 1.35<br>(1.00-1.83) | 1.33<br>(1.09-1.63) |

<sup>#</sup> Adjusted for age, sex, race, field center, waist circumference

<sup>\*</sup> Adjusted for age, sex, race, field center, waist circumference, systolic BP, anti-hypertensive medications, HDL, LDL, triglycerides, CRP, fasting glucose, hypoglycemic medications

<sup>+</sup> Adjusted for age, sex, race, field center, waist circumference, systolic BP, anti-hypertensive medications, HDL, LDL, triglycerides, CRP, fasting glucose, hypoglycemic medications, diastolic BP, grip strength, physical activity, heart rate

P-values for interaction per doubling:

Model 1: p=0.18

Model 2: p=0.03

Model 3: p=0.07

**Table S3. CVD Mortality among participants with prevalent CVD according to Sex-Specific Quartiles.**

| FABP-4 Range | Person-Time | Deaths | Rate | 95% CI     |
|--------------|-------------|--------|------|------------|
| <b>Men</b>   |             |        |      |            |
| ≤18.64       | 838.0       | 33     | 39.4 | 28.0-55.4  |
| 18.65-23.63  | 775.7       | 49     | 63.2 | 47.7-83.6  |
| 23.64-30.58  | 761.6       | 48     | 63.0 | 47.5-83.6  |
| >30.58       | 884.6       | 72     | 81.4 | 64.6-102.5 |
| <b>Women</b> |             |        |      |            |
| ≤27.56       | 570.7       | 17     | 29.8 | 18.5-47.9  |
| 27.57-35.25  | 760.2       | 30     | 39.4 | 27.6-56.4  |
| 35.26-45.91  | 618.2       | 28     | 45.3 | 31.3-65.6  |
| >45.91       | 767.0       | 54     | 70.4 | 53.9-91.9  |

FABP-4: Fatty acid binding protein

**Table S4. Hazard ratios (95% confidence intervals) of cardiovascular mortality associated with circulating levels of FABP-4 among participants with prevalent CVD according to sex-specific quartiles.**

|                                             | Q1     | Q2                  | Q3                  | Q4                  | per doubling        |
|---------------------------------------------|--------|---------------------|---------------------|---------------------|---------------------|
| <b>Cardiovascular Mortality<sup>+</sup></b> |        |                     |                     |                     |                     |
| <b>WOMEN</b>                                |        |                     |                     |                     |                     |
|                                             | ≤27.56 | >27.56-35.25        | >35.25-45.91        | >45.91              |                     |
| Model 1 <sup>#</sup>                        | (Ref.) | 1.44<br>(0.79-2.65) | 1.75<br>(0.93-3.31) | 2.65<br>(1.47-4.79) | 1.74<br>(1.26-2.40) |
| Model 2 <sup>*</sup>                        | (Ref.) | 1.52<br>(0.80-2.87) | 1.68<br>(0.84-3.36) | 2.44<br>(1.27-4.67) | 1.62<br>(1.12-2.33) |
| Model 3 <sup>+</sup>                        | (Ref.) | 1.64<br>(0.86-3.13) | 1.78<br>(0.89-3.58) | 2.60<br>(1.35-4.99) | 1.65<br>(1.14-2.38) |
| <b>MEN</b>                                  |        |                     |                     |                     |                     |
|                                             | ≤18.65 | >18.64-23.63        | >23.63-30.58        | >30.58              |                     |
| Model 1 <sup>#</sup>                        | (Ref.) | 1.90<br>(1.19-3.04) | 2.02<br>(1.23-3.32) | 2.82<br>(1.74-4.55) | 1.86<br>(1.43-2.43) |
| Model 2 <sup>*</sup>                        | (Ref.) | 1.91<br>(1.18-3.08) | 1.91<br>(1.15-3.16) | 2.52<br>(1.51-4.19) | 1.69<br>(1.27-2.24) |
| Model 3 <sup>+</sup>                        | (Ref.) | 1.84<br>(1.12-3.00) | 1.84<br>(1.10-3.09) | 2.37<br>(1.40-4.00) | 1.61<br>(1.19-2.16) |

<sup>#</sup> Adjusted for age, sex, race, field center, waist circumference

<sup>\*</sup> Adjusted for age, sex, race, field center, waist circumference, systolic BP, anti-hypertensive medications, HDL, LDL, triglycerides, CRP, fasting glucose, hypoglycemic medications

<sup>+</sup> Adjusted for age, sex, race, field center, waist circumference, systolic BP, anti-hypertensive medications, HDL, LDL, triglycerides, CRP, fasting glucose, hypoglycemic medications, diastolic BP, grip strength, physical activity, heart rate  
P-values for interaction per doubling:

Model 1: p=0.96

Model 2: p=1.0

Model 3: p=0.83
